# Supplementary material for: The Evidence of Glioblastoma Heterogeneity
Source: PubMed Central journal article supplement (PMC4306917; doi:10.1038/srep07979), 2015-01-27
Supplement: srep07979-s1.pdf [file srep07979-s1.pdf]

Title:

The Evidence of Glioblastoma Heterogeneity

Authors:

Akio Soeda, Akira Hara, Takahiro Kunisada, Shin-ichi Yoshimura, Toru Iwama, Deric M. Park

Supplementary Figure 1a. The 4 clones expressed the stem cell marker Sox2 (red). Scale bars = 100  $\mu$ m.

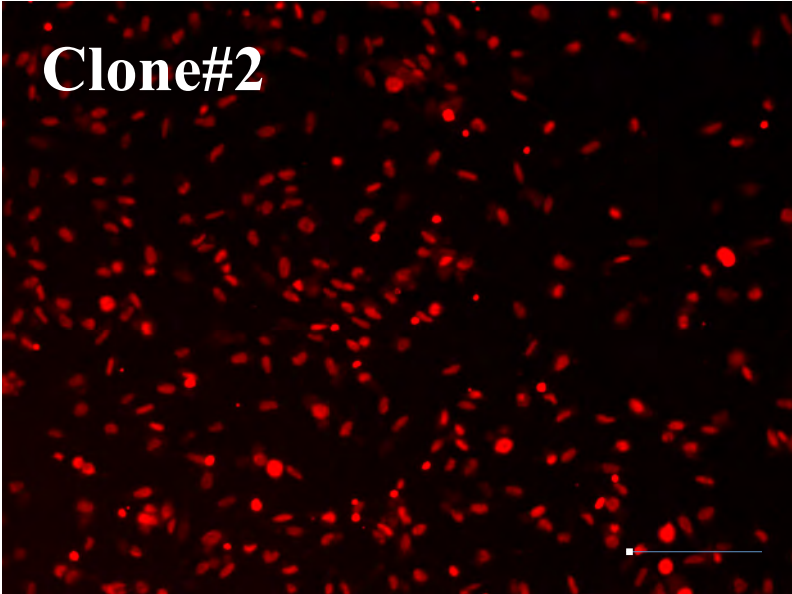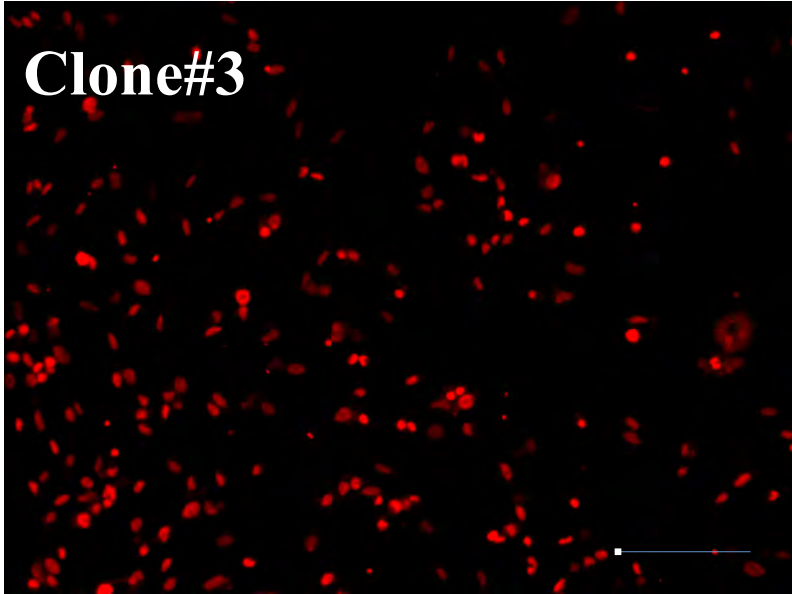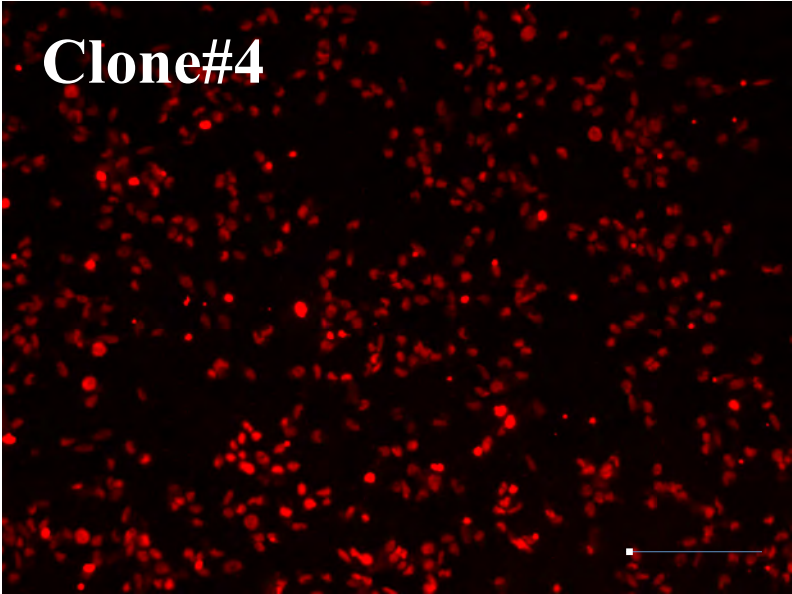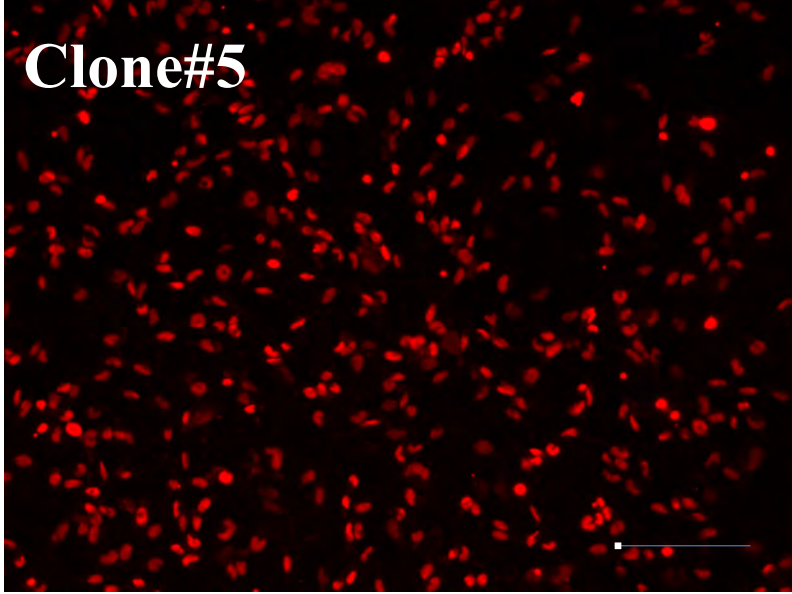

Supplementary Figure 1b. The 4 clones expressed the stem cell marker Musashi (green). Scale bars = 100  $\mu$ m.

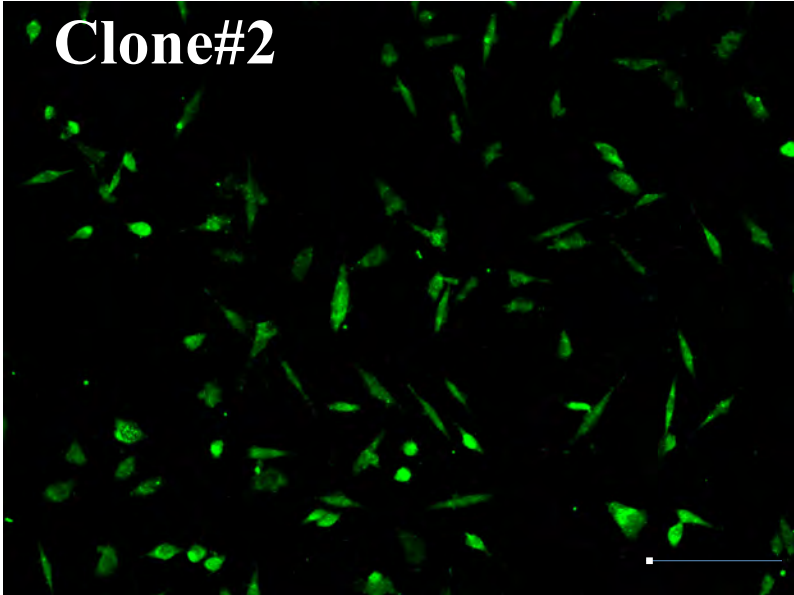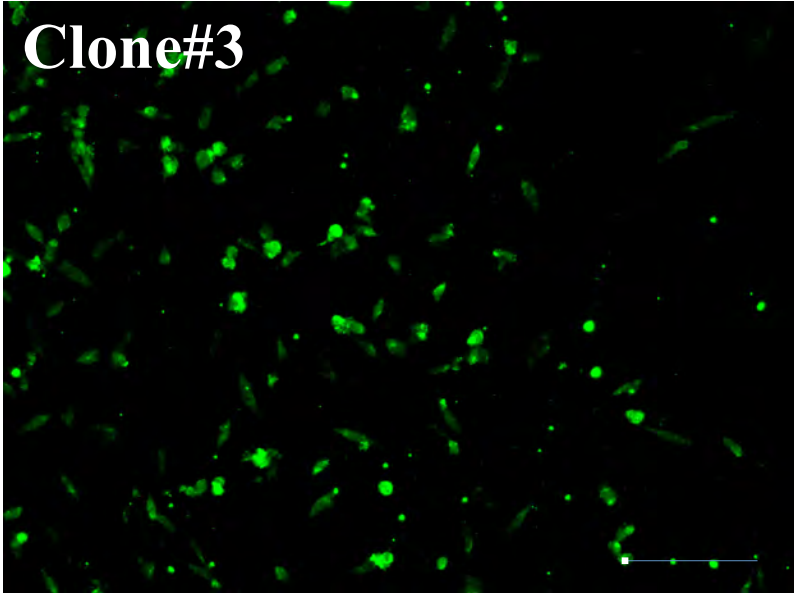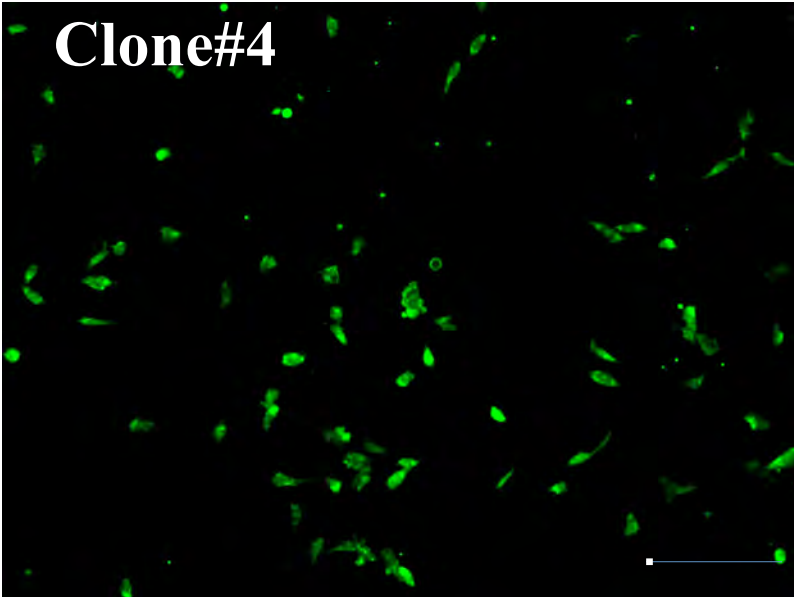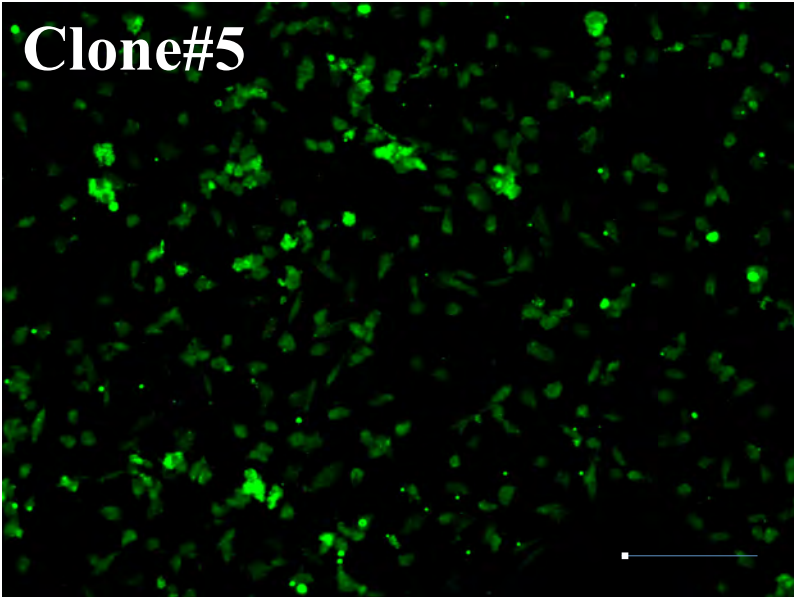

Supplementary Figure2. FACS analysis of EGFR, CXCR4, CD54 and CD166.

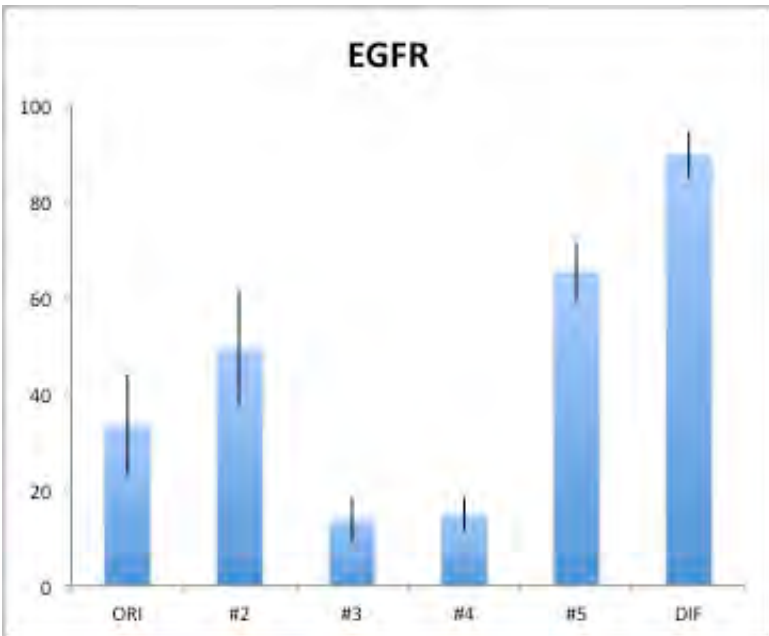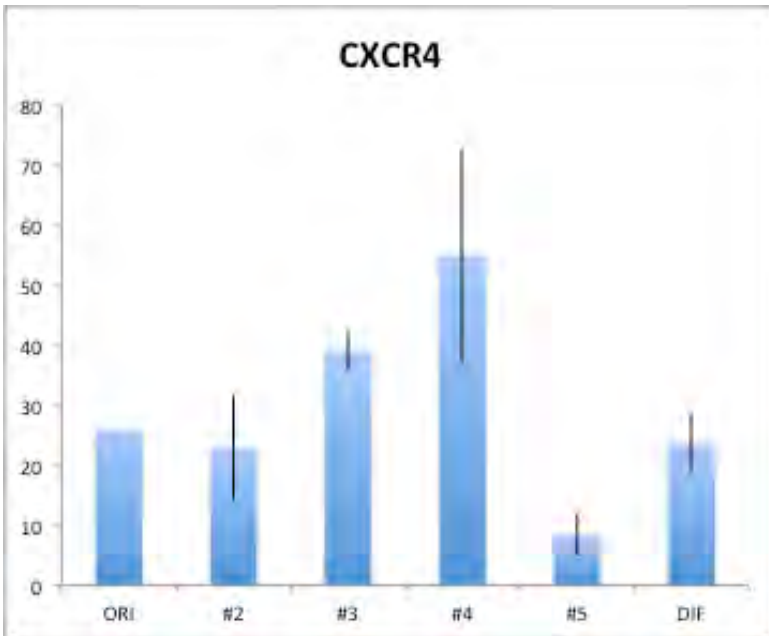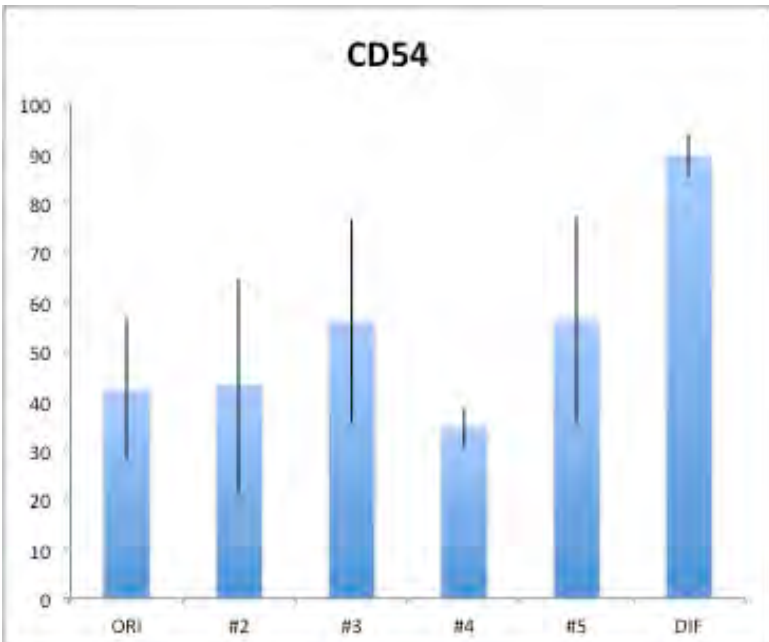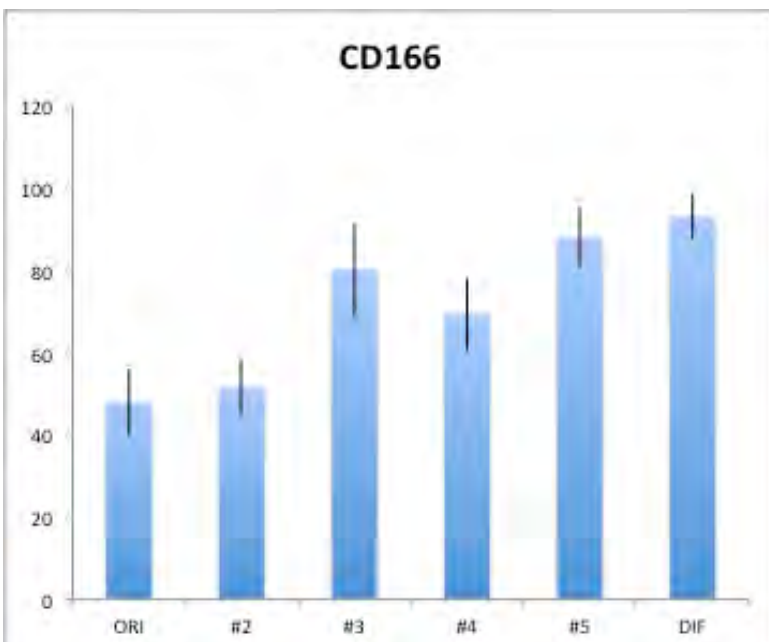

Supplementary Figure 3. Full length of blots seen in Figure 3b.

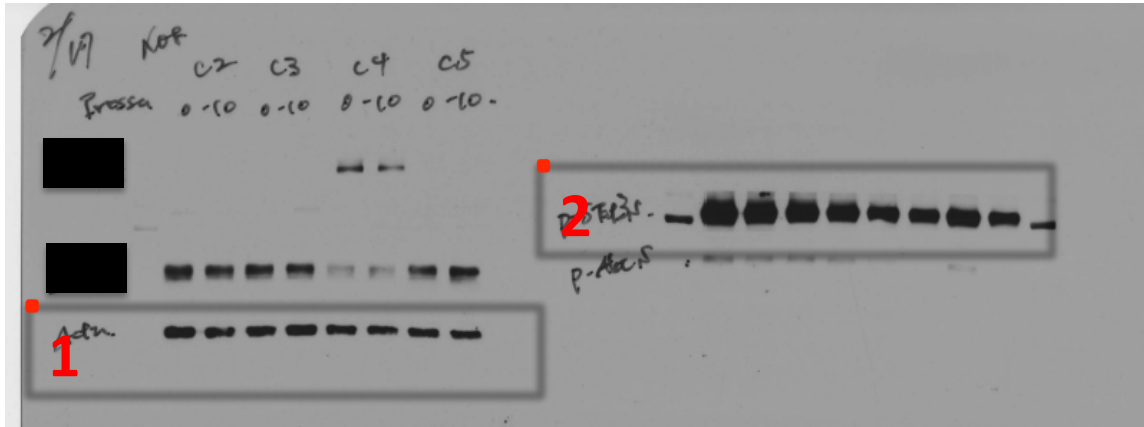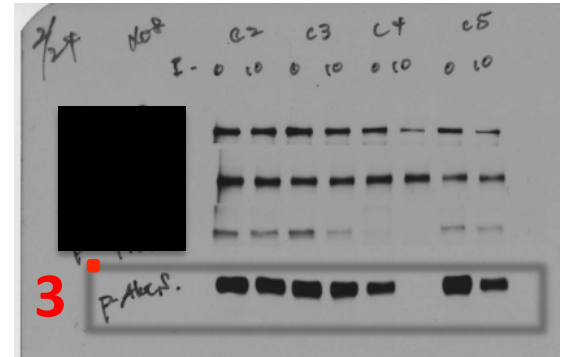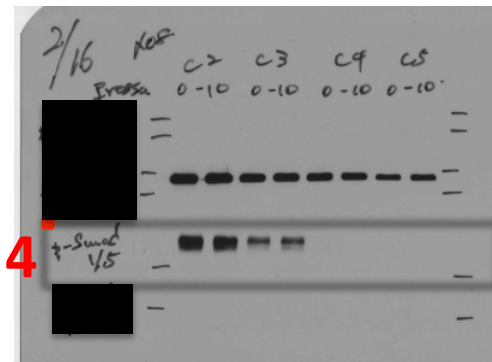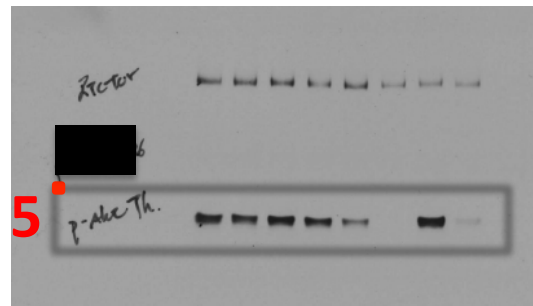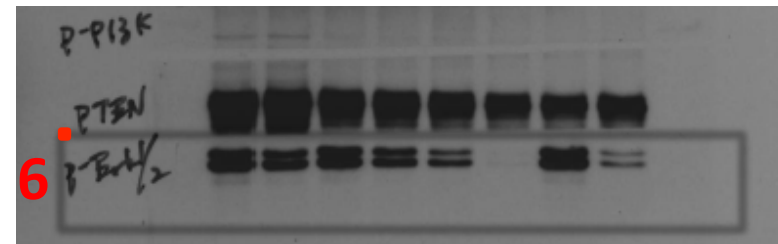

1)Actin, 2)p-Stat3S, 3)p-AktS, 4)p-Smad1/5, 5)p-AktT, 6)p-ERK1/2



Supplementary Table1. Fold-changes in the values for genes were calculated as the ratio of the signal values of the bulk-sphere cells (original cells before cloning) to the values of each clone of cells. Only gene expression changes with 2-fold significance are shown.

| GeneSymbol | GenbankAccession             | DIF   | Clone#2 | Clone#3 | Clone#4 | Clone#5 | X01GB |
|------------|------------------------------|-------|---------|---------|---------|---------|-------|
| AKR1B10    | <a href="#">NM_020299</a>    | 1.84  | -1.11   | -1.73   | -1.73   | -1.02   | 4.03  |
| AKR1B10    | <a href="#">NM_020299</a>    | 1.87  | -1.38   | -1.84   | -2.10   | -1.19   | 3.95  |
| AKR1B15    | <a href="#">NM_001080538</a> | 1.81  | -1.08   | -1.68   | -2.19   | -1.15   | 3.98  |
| ANGPTL1    | <a href="#">NM_004673</a>    | -5.66 | 2.29    | 2.11    | 1.30    | 2.24    | -6.41 |
| ANGPTL1    | <a href="#">NM_004673</a>    | -3.66 | 2.47    | 2.09    | 1.18    | 2.39    | -6.05 |
| ANGPTL4    | <a href="#">NM_139314</a>    | 5.15  | -2.00   | -1.73   | -2.70   | -3.37   | -5.05 |
| ANGPTL4    | <a href="#">NM_139314</a>    | 5.27  | -2.01   | -1.95   | -2.89   | -3.16   | -4.24 |
| ANKRD20A5P | <a href="#">BC022023</a>     | -3.48 | -1.74   | -1.93   | -2.00   | -1.30   | -3.20 |
| ANKRD20A9P | <a href="#">NR_027995</a>    | -2.76 | -1.13   | -1.18   | -1.72   | -1.38   | -4.47 |
| ATXN7L1    | <a href="#">BC003517</a>     | -5.05 | -2.82   | -2.71   | -2.51   | -1.21   | -1.08 |
| BST2       | <a href="#">NM_004335</a>    | -3.57 | -1.22   | -1.55   | -1.51   | -2.12   | 1.05  |
| C21orf122  | <a href="#">NR_027292</a>    | 5.10  | 2.83    | 3.76    | 2.75    | 3.82    | 2.56  |
| C21orf37   | <a href="#">NR_037585</a>    | -5.70 | -2.21   | -2.69   | -1.59   | -1.87   | -2.51 |
| C3         | <a href="#">NM_000064</a>    | 1.56  | -1.34   | -3.43   | -3.36   | -2.64   | 4.30  |
| CABLES1    | <a href="#">NM_138375</a>    | 1.41  | -1.04   | -1.23   | -1.20   | -1.23   | -5.79 |
| CCDC165    | <a href="#">NM_015210</a>    | 3.83  | 1.49    | 1.33    | 1.60    | 1.81    | 1.03  |
| CCND1      | <a href="#">NM_053056</a>    | 2.89  | 1.22    | 1.02    | 1.31    | 1.35    | 1.01  |
| CCND1      | <a href="#">NM_053056</a>    | 2.90  | 1.18    | 1.01    | 1.30    | 1.49    | 1.02  |
| CCND1      | <a href="#">NM_053056</a>    | 2.95  | 1.31    | 1.07    | 1.44    | 1.51    | 1.07  |
| COL1A1     | <a href="#">NM_000088</a>    | 10.60 | -1.35   | 5.86    | -3.40   | 5.08    | -3.73 |
| COL8A2     | <a href="#">NM_005202</a>    | 1.06  | -2.72   | -1.98   | -4.40   | -1.38   | -3.24 |
| COX8C      | <a href="#">NM_182971</a>    | -4.75 | -2.00   | -1.65   | -1.94   | -1.25   | -3.01 |
| CRYAB      | <a href="#">NM_001885</a>    | 3.41  | -2.39   | -2.71   | -2.58   | -2.50   | -2.31 |
| CRYAB      | <a href="#">NM_001885</a>    | 3.42  | -2.40   | -2.58   | -2.58   | -2.46   | -2.29 |
| CTGF       | <a href="#">NM_001901</a>    | 6.09  | 2.42    | 3.18    | 1.72    | 1.80    | -4.15 |
| CTGF       | <a href="#">NM_001901</a>    | 6.16  | 2.53    | 3.29    | 1.75    | 1.72    | -4.71 |

# Supplementary Table1. (Continued)

|              |                              |       |       |       |       |       |       |
|--------------|------------------------------|-------|-------|-------|-------|-------|-------|
| DPF3         | <a href="#">AK024141</a>     | -2.44 | 1.19  | 3.12  | 1.40  | 1.13  | 2.25  |
| DPF3         | <a href="#">AK024141</a>     | -1.36 | 1.07  | 3.07  | 1.61  | 1.09  | 2.66  |
| EBI3         | <a href="#">NM_005755</a>    | 1.84  | -1.10 | -1.23 | -1.15 | -2.03 | -2.68 |
| EDIL3        | <a href="#">NM_005711</a>    | 1.33  | -4.32 | -2.54 | -5.20 | -4.63 | -3.19 |
| EFNA1        | <a href="#">NM_004428</a>    | -3.30 | -1.06 | -1.25 | -1.20 | -2.13 | -3.00 |
| ESR2         | <a href="#">NM_001437</a>    | -3.86 | 1.59  | 1.08  | 1.38  | 3.33  | 1.41  |
| ESR2         | <a href="#">NM_001437</a>    | -3.82 | 1.29  | 1.03  | 1.34  | 3.33  | 1.30  |
| ESR2         | <a href="#">NM_001437</a>    | -3.79 | 1.67  | 1.12  | 1.54  | 3.47  | 1.57  |
| ESR2         | <a href="#">NM_001437</a>    | -3.57 | 2.04  | 1.66  | 2.08  | 3.85  | 1.98  |
| ESR2         | <a href="#">NM_001437</a>    | -3.56 | 1.86  | 1.22  | 1.73  | 3.69  | 1.80  |
| ESR2         | <a href="#">NM_001437</a>    | -3.44 | 1.93  | 1.51  | 1.87  | 3.73  | 1.77  |
| ESR2         | <a href="#">NM_001437</a>    | -2.52 | 2.20  | 1.34  | 2.00  | 3.89  | 1.95  |
| ESR2         | <a href="#">NM_001437</a>    | -2.10 | 1.80  | 1.21  | 1.60  | 3.56  | 1.76  |
| FAM134B      | <a href="#">NM_001034850</a> | -3.83 | -1.79 | -1.55 | -1.05 | -1.99 | -2.08 |
| FBRSL1       | <a href="#">BC013284</a>     | 3.22  | 1.32  | 1.70  | 1.37  | 1.97  | 1.86  |
| FHL2         | <a href="#">NM_001039492</a> | 5.79  | 1.21  | 1.04  | 2.39  | -1.27 | -4.17 |
| FLJ45684     | <a href="#">AK127589</a>     | 5.35  | 2.49  | 2.40  | 1.84  | 2.47  | 2.71  |
| FZR1         | <a href="#">NM_016263</a>    | 3.15  | 1.19  | 1.56  | 1.06  | 1.54  | 1.52  |
| GBP2         | <a href="#">NM_004120</a>    | -1.04 | -3.24 | -2.47 | -2.30 | -2.99 | -2.44 |
| GRPR         | <a href="#">NM_005314</a>    | 5.72  | 2.32  | 2.49  | 1.83  | 3.64  | 4.83  |
| HBEGF        | <a href="#">NM_001945</a>    | 3.83  | 1.60  | 1.40  | 1.81  | 1.39  | 4.38  |
| HDAC9        | <a href="#">NM_058176</a>    | 4.41  | 1.88  | 1.98  | 2.04  | 3.12  | 2.31  |
| HES7         | <a href="#">NM_001165967</a> | -4.00 | -1.29 | -1.77 | -1.59 | -1.62 | -3.64 |
| HSPB2        | <a href="#">NM_001541</a>    | 1.22  | -1.49 | -1.61 | -1.47 | -1.95 | -1.59 |
| ID1          | <a href="#">NM_002165</a>    | 2.56  | -2.02 | -2.06 | -1.96 | -4.68 | -2.01 |
| ID1          | <a href="#">NM_002165</a>    | 2.60  | -2.03 | -2.16 | -1.99 | -4.64 | -2.08 |
| IGFBP7       | <a href="#">NM_001553</a>    | 4.08  | -1.81 | 1.32  | -5.61 | 1.92  | -1.66 |
| IGFBP7       | <a href="#">NM_001553</a>    | 4.14  | -1.85 | 1.36  | -5.64 | 1.93  | -1.70 |
| KYNU         | <a href="#">NM_001032998</a> | -1.99 | -4.10 | -4.51 | -3.19 | -4.86 | -7.04 |
| LOC100131262 | <a href="#">AK092421</a>     | 4.72  | 1.84  | 2.84  | 1.65  | 2.26  | 2.93  |
| LOC339929    | <a href="#">NR_036497</a>    | 4.75  | 2.61  | 3.35  | 2.74  | 3.23  | 2.07  |
| LOC389332    | <a href="#">NR_024418</a>    | 3.94  | -1.12 | 1.32  | -1.89 | 1.56  | -4.31 |
| MSMP         | <a href="#">NM_001044264</a> | -4.31 | 1.50  | 5.61  | 4.13  | 5.30  | 9.01  |
| NDNF         | <a href="#">NM_024574</a>    | 1.58  | -1.13 | -1.80 | -1.75 | -1.11 | -2.86 |

## Supplementary Table1. (Continued)

|            |                              |       |       |       |       |       |       |
|------------|------------------------------|-------|-------|-------|-------|-------|-------|
| NFIA       | <a href="#">NM_001134673</a> | -2.07 | 1.31  | 1.41  | 1.03  | 1.58  | 5.40  |
| NPAS1      | <a href="#">NM_002517</a>    | 1.05  | -1.55 | -1.47 | -1.23 | -1.35 | -1.81 |
| PACS2      | <a href="#">NM_001100913</a> | 2.61  | 1.16  | 1.55  | 1.20  | 1.10  | 1.44  |
| PRINS      | <a href="#">NR_023388</a>    | -1.60 | 2.00  | 2.09  | 1.39  | 1.88  | 2.29  |
| S1PR5      | <a href="#">NM_030760</a>    | -2.67 | -1.14 | -1.06 | -1.62 | -1.10 | -5.62 |
| SEMA3F     | <a href="#">NM_004186</a>    | 2.81  | -1.44 | -1.44 | -1.15 | -1.71 | -1.41 |
| SERPINB8   | <a href="#">NM_001031848</a> | 4.09  | 2.18  | 2.83  | 2.22  | 2.35  | 1.00  |
| SEZ6L2     | <a href="#">NM_201575</a>    | 1.42  | -1.61 | 2.95  | -2.70 | -2.74 | 2.06  |
| SLC2A3     | <a href="#">NM_006931</a>    | -2.73 | -1.23 | -1.14 | -1.07 | -1.06 | -3.36 |
| SLC37A2    | <a href="#">NM_198277</a>    | 7.28  | 2.61  | 2.27  | 1.87  | 4.38  | 2.77  |
| SLC6A15    | <a href="#">NM_018057</a>    | -2.32 | -1.12 | -4.88 | -1.13 | -4.90 | -1.07 |
| SLCO4A1    | <a href="#">NM_016354</a>    | -2.32 | 1.83  | 1.27  | 2.15  | 2.47  | 1.35  |
| SLN        | <a href="#">NM_003063</a>    | 2.12  | -2.73 | -3.94 | -4.06 | -2.63 | -6.85 |
| SMAD9      | <a href="#">NM_005905</a>    | 1.49  | -1.36 | -1.59 | -1.79 | -2.50 | -1.32 |
| SMAD9      | <a href="#">NM_001127217</a> | 1.52  | -1.55 | -1.72 | -1.99 | -3.68 | -1.30 |
| SMAD9      | <a href="#">NM_001127217</a> | 1.76  | -1.41 | -1.66 | -2.28 | -2.92 | -1.17 |
| SOHLH2     | <a href="#">NM_017826</a>    | -4.21 | -1.01 | -2.54 | -2.71 | -1.40 | -2.05 |
| SP2        | <a href="#">NM_003110</a>    | 2.25  | 1.11  | 1.10  | 1.05  | 1.03  | 1.54  |
| ST6GALNAC2 | <a href="#">NM_006456</a>    | 2.48  | -1.62 | -2.68 | -1.02 | -1.80 | -1.99 |
| TNNT1      | <a href="#">NM_003283</a>    | 1.59  | -2.06 | -1.83 | -2.33 | -3.66 | -3.40 |
| TNNT1      | <a href="#">NM_003283</a>    | 1.66  | -2.15 | -1.87 | -2.29 | -3.60 | -3.36 |
| TPMT       | <a href="#">NM_000367</a>    | 2.69  | 1.19  | 1.11  | 1.08  | 1.47  | 1.82  |
